# Supplementary material for: Chromosomal instability in untreated primary prostate cancer as an indicator of metastatic potential
Source: Springer Nature journal article supplement (doi:10.1186/s12885-020-06817-1), 2020-05-07
Supplement: MOESM1 [file 17962554]

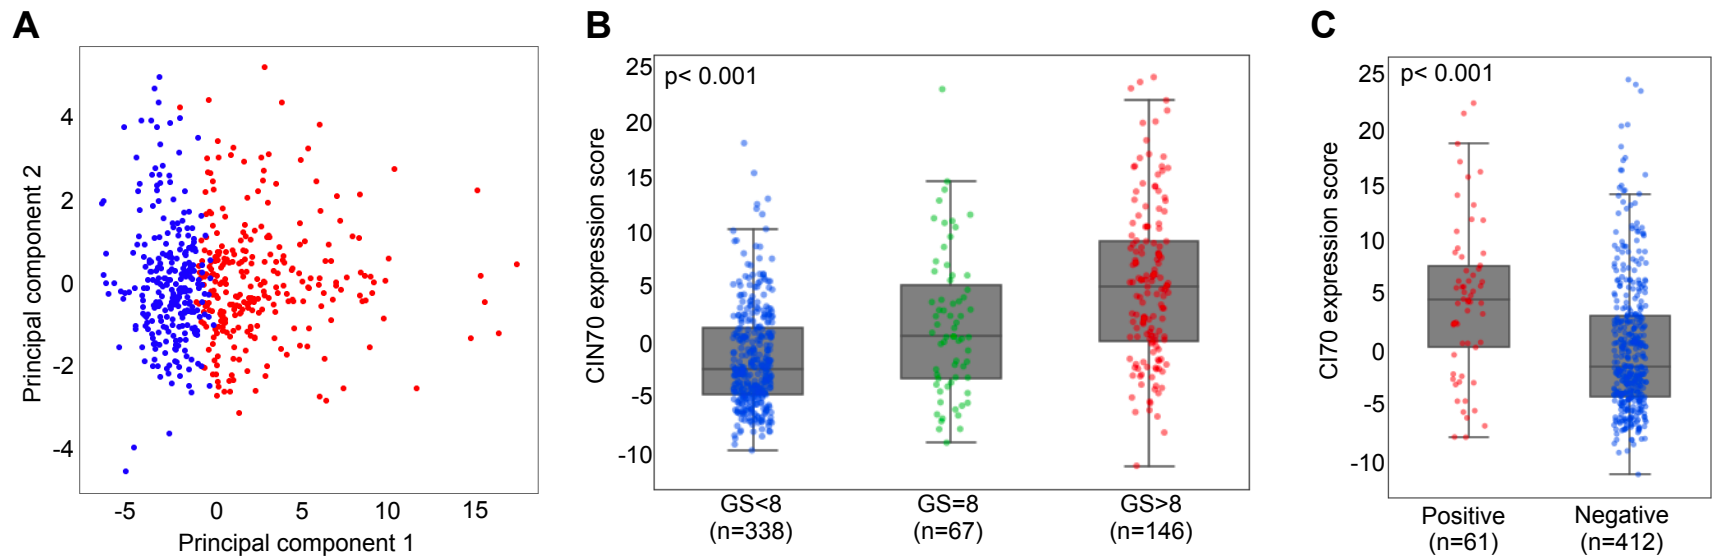

**Supplemental Figure 1. CIN70 score positively correlates with Gleason sum and biochemical recurrence.** (A) Principal component analysis of TCGA samples by CIN70 score (CIN70-High in red, CIN70-Low in blue). (B) Distribution of CIN70 scores among TCGA PC cases stratified by Gleason sum or (C) Biochemical recurrence.

**A**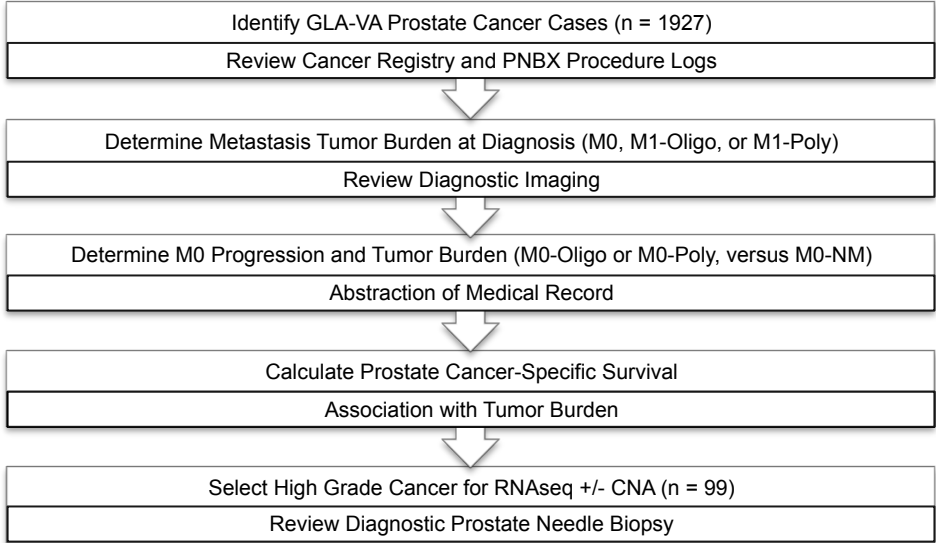**B**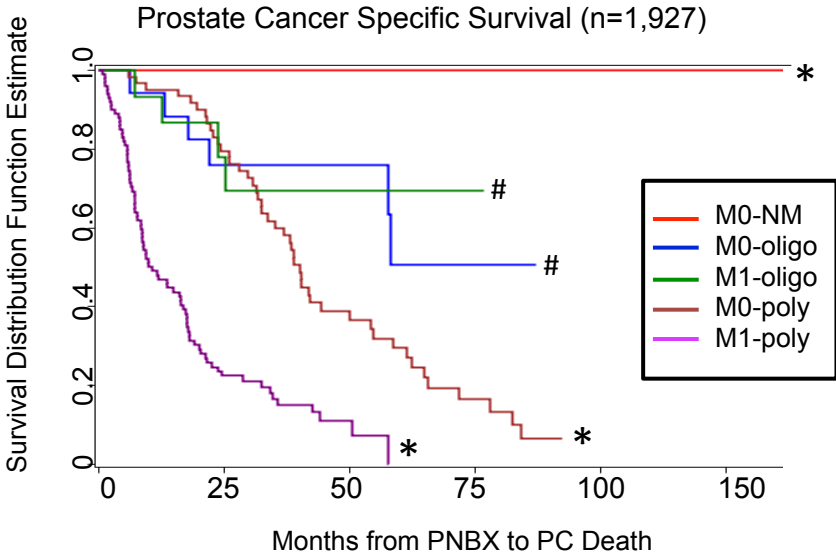

**Supplemental Figure 2. PC survival is associated with metastatic tumor burden.** (A) Schematic of approach to cohort annotation and assembly for molecular analysis. (B) Diagram depicting the distribution of clinical stage (M0, M1, or MX) and tumor burden at diagnosis or following metastatic progression (oligo or poly) of 2,134 PC cases diagnosed and treated within the Greater Los Angeles VA Healthcare System between 2000 and 2017. Cases selected for RNA sequencing +/- CNA of diagnostic PNBX are highlighted in red with brackets. (C) Kaplan-Meier estimates of PC-specific mortality experienced by tumor burden sub-cohorts. \* P<0.01; # P=0.9995.

**Supplemental Table 1: Clinical Characteristics of PNBX Cohort**

|                          | M0 non-metastatic (M0-NM)<br>n=23 |    | M0 oligometastatic (M0-oligo)<br>n=7 |   | M0 polymetastatic (M0-poly)<br>n=7 |   | M1 oligometastatic (M1-oligo)<br>n=10 |    | M1 polymetastatic (M1-poly)<br>n=52 |    | p                    |
|--------------------------|-----------------------------------|----|--------------------------------------|---|------------------------------------|---|---------------------------------------|----|-------------------------------------|----|----------------------|
| Age                      |                                   |    |                                      |   |                                    |   |                                       |    |                                     |    |                      |
| mean (SD)                | 68.8 (8.1)                        |    | 71.9 (10.7)                          |   | 62.6 (9.1)                         |   | 71.2 (10.0)                           |    | 70.3 (10.2)                         |    | 0.3274 <sup>a</sup>  |
| median (range)           | 65.8 (58.6, 83.3)                 |    | 71.9 (60.6, 90.4)                    |   | 61.8 (49.0, 78.5)                  |   | 68.7 (61.5, 93.2)                     |    | 70.1 (46.1, 88.6)                   |    |                      |
| Race                     |                                   |    |                                      |   |                                    |   |                                       |    |                                     |    |                      |
| White                    | 87%                               | 20 | 43%                                  | 3 | 43%                                | 3 | 40%                                   | 4  | 52%                                 | 27 | 0.0133 <sup>d</sup>  |
| Non-White                | 13%                               | 3  | 57%                                  | 4 | 57%                                | 4 | 60%                                   | 6  | 48%                                 | 25 |                      |
| PSA at Bx                |                                   |    |                                      |   |                                    |   |                                       |    |                                     |    |                      |
| ≤20                      | 78%                               | 18 | 71%                                  | 5 | 29%                                | 2 | 30%                                   | 3  | 20%                                 | 10 | <0.0001 <sup>d</sup> |
| >20                      | 22%                               | 5  | 29%                                  | 2 | 71%                                | 5 | 70%                                   | 7  | 80%                                 | 40 |                      |
| PSA at nadir after ADT   |                                   |    |                                      |   |                                    |   |                                       |    |                                     |    |                      |
| mean (SD)                |                                   |    | 0.5 (0.7)                            |   | 101.5 (227.0)                      |   | 2.3 (4.9)                             |    | 51.6 (154.9)                        |    | 0.0308 <sup>b</sup>  |
| median (range)           |                                   |    | 0.1 (0.02, 1.8)                      |   | 13.1 (0.01, 564.6)                 |   | 0.2 (0.01, 15.5)                      |    | 1.7 (0.01, 967.9)                   |    | 0.0614 <sup>c</sup>  |
| Clinical T Stage         |                                   |    |                                      |   |                                    |   |                                       |    |                                     |    |                      |
| T1/T2                    | 68%                               | 15 | 67%                                  | 4 | 100%                               | 7 | 25%                                   | 2  | 60%                                 | 28 | 0.0445 <sup>d</sup>  |
| T3/T4                    | 32%                               | 7  | 33%                                  | 2 | 0%                                 | 0 | 75%                                   | 6  | 40%                                 | 19 |                      |
| Clinical N Stage         |                                   |    |                                      |   |                                    |   |                                       |    |                                     |    |                      |
| N0                       | 100%                              | 23 | 43%                                  | 3 | 71%                                | 5 | 50%                                   | 5  | 62%                                 | 32 | 0.0005 <sup>d</sup>  |
| N1                       | 0%                                | 0  | 29%                                  | 2 | 14%                                | 1 | 20%                                   | 2  | 33%                                 | 17 |                      |
| NX                       | 0%                                | 0  | 29%                                  | 2 | 14%                                | 1 | 30%                                   | 3  | 6%                                  | 3  |                      |
| Progression Tissue Sites |                                   |    |                                      |   |                                    |   |                                       |    |                                     |    |                      |
| LAN only                 |                                   |    | 14.3%                                | 1 | 0.0%                               | 0 | 0.0%                                  | 0  | 0.0%                                | 0  | 0.0029 <sup>d</sup>  |
| Bone only                |                                   |    | 85.7%                                | 6 | 85.7%                              | 6 | 80.0%                                 | 8  | 36.5%                               | 19 |                      |
| LAN and Bone             |                                   |    | 0.0%                                 | 0 | 14.3%                              | 1 | 20.0%                                 | 2  | 36.5%                               | 19 |                      |
| Soft Tissue ± LAN ± Bone |                                   |    | 0.0%                                 | 0 | 0.0%                               | 0 | 0.0%                                  | 0  | 26.9%                               | 14 |                      |
| Primary Gleason          |                                   |    |                                      |   |                                    |   |                                       |    |                                     |    |                      |
| 3                        | 0%                                | 0  | 0%                                   | 0 | 0%                                 | 0 | 0%                                    | 0  | 8%                                  | 4  | 0.6922 <sup>d</sup>  |
| 4                        | 91%                               | 21 | 86%                                  | 6 | 100%                               | 7 | 80%                                   | 8  | 73%                                 | 37 |                      |
| 5                        | 9%                                | 2  | 14%                                  | 1 | 0%                                 | 0 | 20%                                   | 2  | 20%                                 | 10 |                      |
| Primary Treatment, % (n) |                                   |    |                                      |   |                                    |   |                                       |    |                                     |    |                      |
| ADT                      | 4%                                | 1  | 29%                                  | 2 | 29%                                | 2 | 0%                                    | 0  | 0%                                  | 0  | <0.0001 <sup>d</sup> |
| XRT +/-ADT               | 43%                               | 10 | 14%                                  | 1 | 43%                                | 3 | 0%                                    | 0  | 0%                                  | 0  |                      |
| RP                       | 52%                               | 12 | 57%                                  | 4 | 29%                                | 2 | 100%                                  | 10 | 100%                                | 52 |                      |
| CRPC Progression         |                                   |    |                                      |   |                                    |   |                                       |    |                                     |    |                      |
| Yes                      | 0%                                | 0  | 29%                                  | 2 | 100%                               | 7 | 67%                                   | 6  | 93%                                 | 41 | <0.0001 <sup>d</sup> |
| No                       | 100%                              | 21 | 71%                                  | 5 | 0%                                 | 0 | 33%                                   | 3  | 7%                                  | 3  |                      |
| Cause of Death           |                                   |    |                                      |   |                                    |   |                                       |    |                                     |    |                      |
| Alive                    | 100%                              | 23 | 71%                                  | 5 | 0%                                 | 0 | 70%                                   | 7  | 25%                                 | 13 | <0.0001 <sup>d</sup> |
| Prostate Cancer          | 0%                                | 0  | 29%                                  | 2 | 100%                               | 7 | 30%                                   | 3  | 67%                                 | 35 |                      |
| Other cause              | 0%                                | 0  | 0%                                   | 0 | 0%                                 | 0 | 0%                                    | 0  | 8%                                  | 4  |                      |
| Months of Follow-up      |                                   |    |                                      |   |                                    |   |                                       |    |                                     |    |                      |
| mean (SD)                | 56.2 (28.7)                       |    | 62.4 (24.7)                          |   | 54.8 (28.8)                        |   | 48.5 (34.0)                           |    | 28.1 (24.7)                         |    | <0.0001 <sup>b</sup> |
| median (range)           | 56.1 (1.3, 110.4)                 |    | 55.8 (35.5, 104.3)                   |   | 45.5 (19.0, 109.6)                 |   | 43.2 (6.8, 121.5)                     |    | 16.3 (0.3, 101.0)                   |    | <0.0001 <sup>c</sup> |

a. ANOVA test  
b. Wilcoxon test  
c. median test  
d. Fisher's exact test

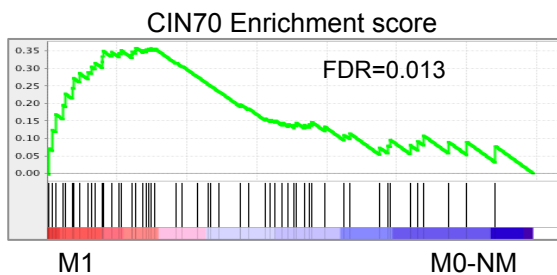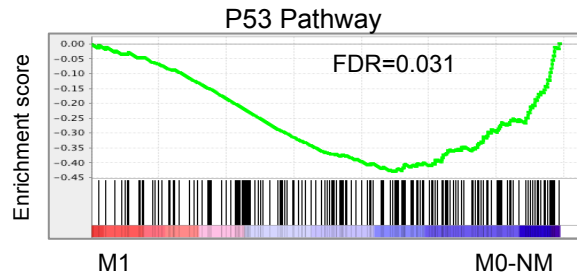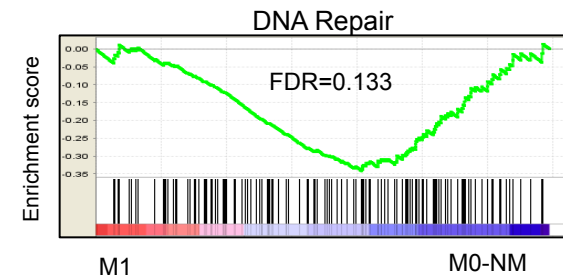

**Supplemental Figure 3. CIN70 Enrichment score in the PNBX dataset correlates with M-stage, frequency of CNAs, and common genomic aberrations in PC.** Gene set enrichment analysis (GSEA) displays enrichment scores (ES) of CIN70 DEG and genes associated with P53 pathway inactivation (middle) correlate with M-stage, while genes associated with DNA damage repair genes shows no correlation with stage (right).

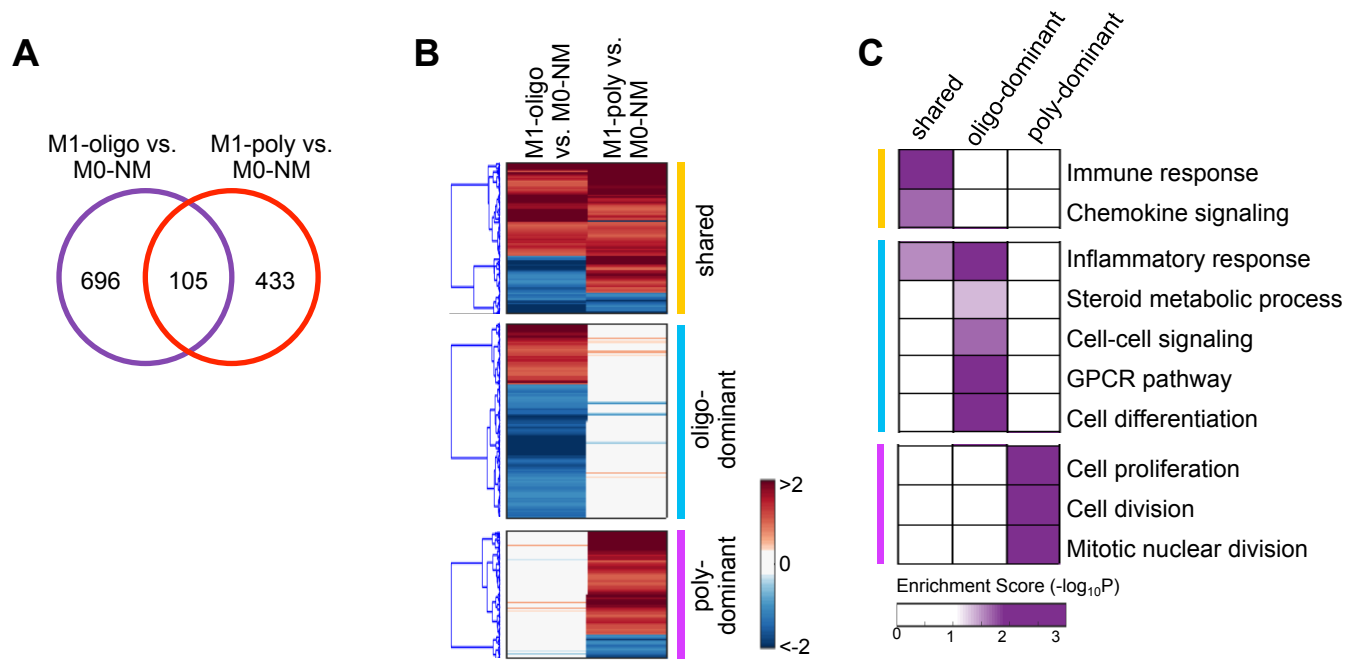

**Supplemental Figure 4. Chromosomal instability and other features shared with mCRPC are significantly enriched in poly relative to oligo cases.** (A) Venn diagram depicts the proportion of DEG in M1-oligo and M1-poly samples. (B) DEGs were categorized into three groups (shared, oligo-dominant, and poly-dominant) based upon differential expression pattern. A heat map displays three clusters depending on their differential expression patterns of the original 1,234 DEG identified in all M1 cases (M1-oligo + M1-poly) compared to M0-NP. Colors indicate increased (red) and decreased (blue) expression. (C) Cellular processes (rows) enriched by genes in each cluster (columns). Functional enrichment analysis of genes in three clusters was independently performed using DAVID software. Significantly enriched processes for each cluster were scored with respect to the obtained p-value. Colors represent significance as  $-\log_{10}(p\text{-value})$ . The enrichment scores are displayed in a violet color gradient: violet ( $P < 0.01$ ), bright violet ( $0.05 < P < 0.01$ ) and white ( $P > 0.05$ ).

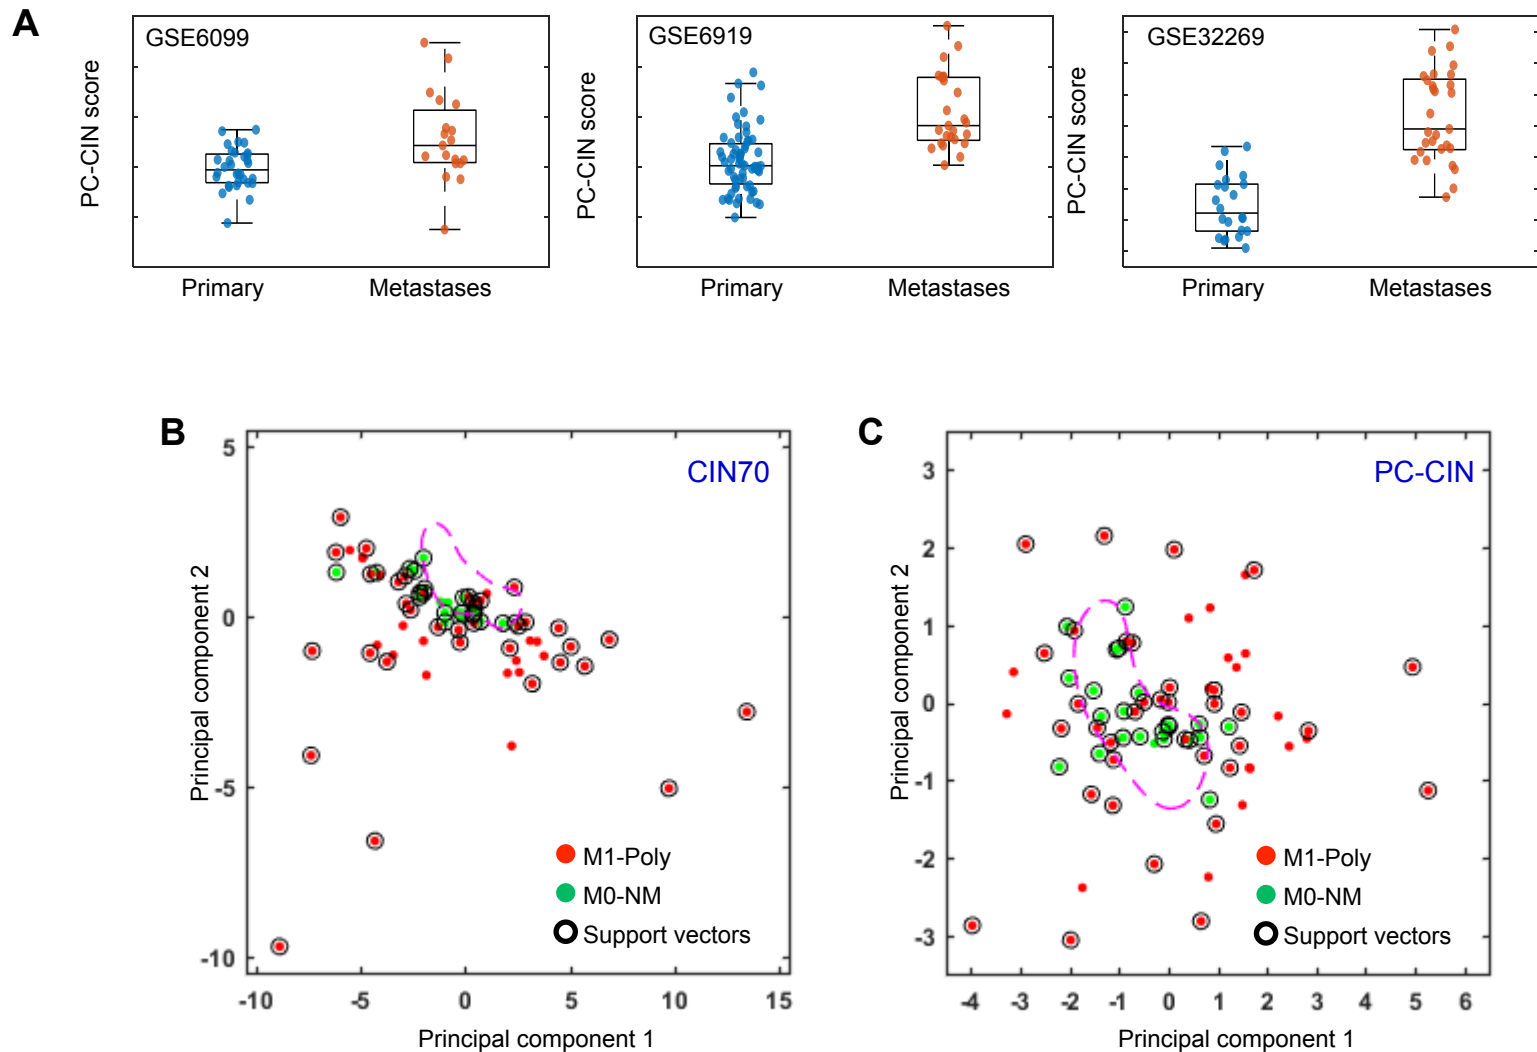

**Supplemental Figure 5. PC-CIN differential expression and application of the SVM prediction model.** (A) PC-CIN applied to additional mCRPC datasets show significantly increased expression in metastases compared to primary tumors (rank-sum for all  $p < 0.0001$ ). (B) Scatter diagram of the first two principal components display distribution of M1-poly and M0-NM tumors classified by SVM classification using genes in the CIN70 signature or PC-CIN (C). The expression data of the genes in CIN70 and PC-CIN signatures were decomposed by PCA, and their 1st and 2nd principal components are illustrated in the principal component 1 vs. principal component 2 coordinate system. The red and green dots indicate M1-Poly and M0-NM tumors, respectively. The support vectors and the decision boundary were displayed with black circle and dotted line in magenta, respectively.

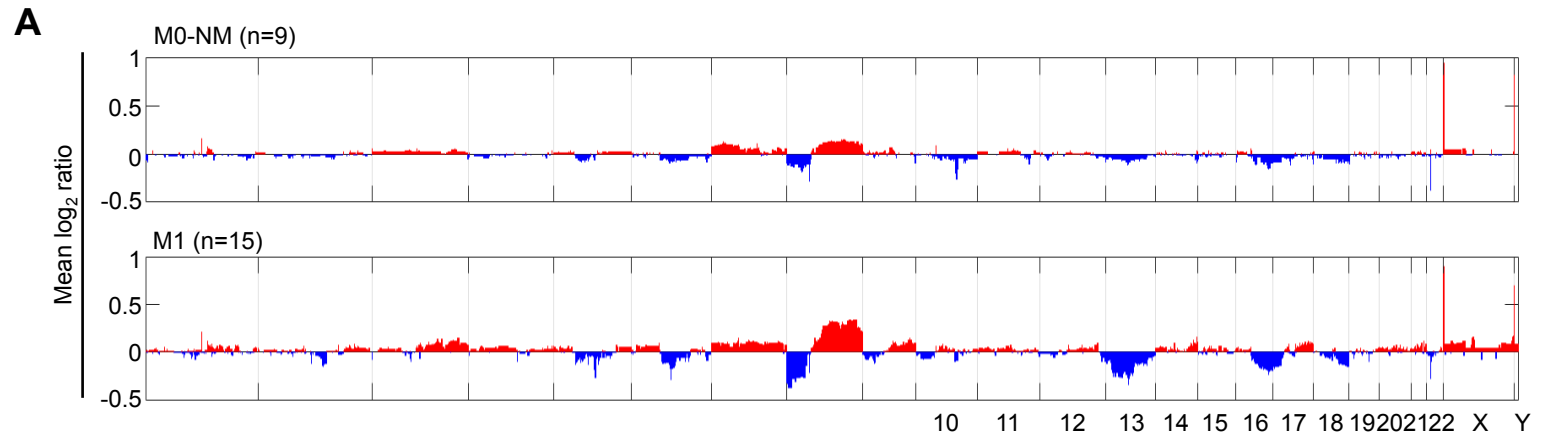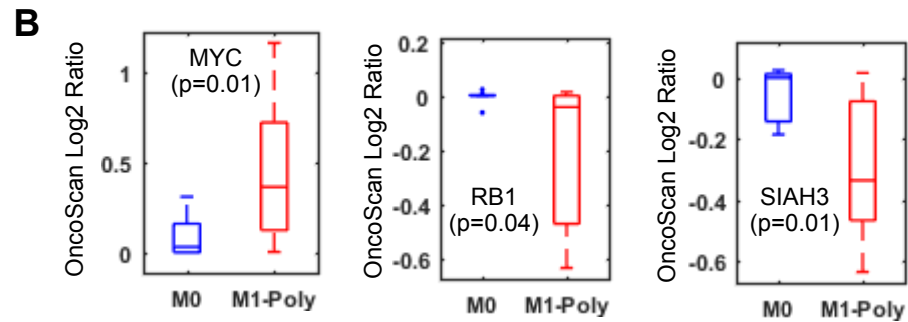

**Supplemental Figure 6. Frequency plot of CNAs detected by OncoScan array in a subset of M1-poly versus M0-NM PNBX cases (A)** Frequencies of gains (in red) and losses (in blue) are indicated. Log<sub>2</sub>Ratio of probeset intensities representing genome copy number gains and losses were plotted as a function of genome location with chromosomes 1 to the left and chromosomes 22 and XY to the right. **(B)** Gain of MYC and loss of RB1 and SIAH3 is significantly different in M1 compared to M0-NM cases in CAN analysis via OncoScan. Samples size: M1, n=15 and M0, n=9 (24 total cases).

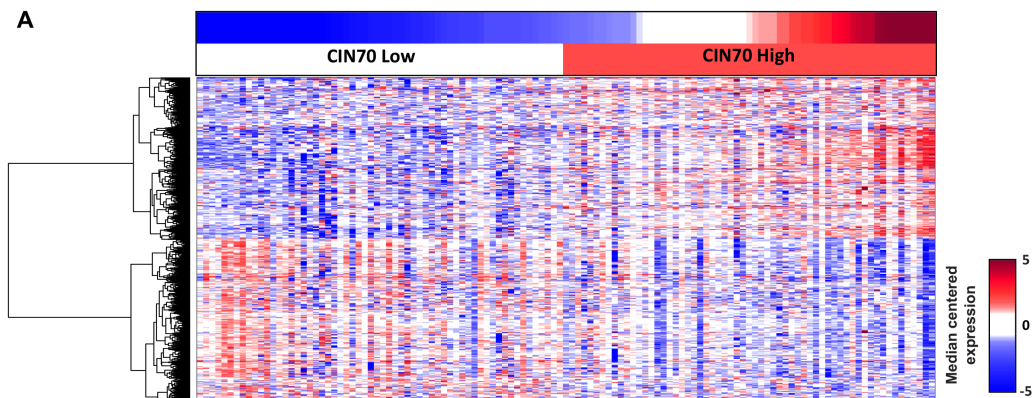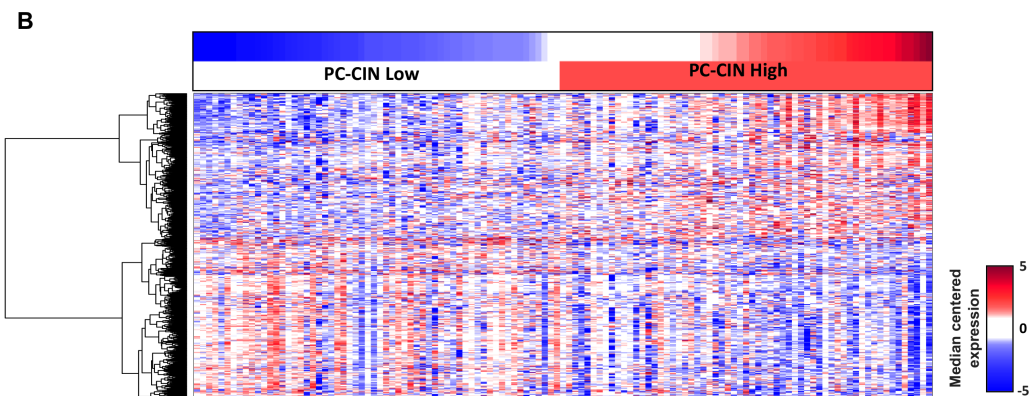

**Supplemental Figure 7. Differential gene expression based on CIN70 or PC-CIN score.** Heat maps of PNBX samples categorized as CIN70-High versus CIN70-Low (**A**) or PC-CIN-High versus PC-CIN-Low (**B**). Biological processes associated with CIN70 (**C**) or PC-CIN (**D**) status are shown in the tables.

**C**

**CIN70 up**

| GO_term                        | Gene_count | P-value  |
|--------------------------------|------------|----------|
| cell cycle process             | 128        | 2.5E-56  |
| cell cycle                     | 136        | 1.15E-52 |
| mitotic cell cycle             | 103        | 9.33E-49 |
| mitotic cell cycle process     | 99         | 2.11E-48 |
| nuclear division               | 78         | 3.94E-43 |
| chromosome segregation         | 62         | 2.26E-42 |
| organelle fission              | 79         | 4.81E-42 |
| chromosome organization        | 101        | 4.65E-39 |
| nuclear chromosome segregation | 55         | 3.56E-38 |
| mitotic nuclear division       | 64         | 9.85E-38 |

**CIN70 down**

| GO_term                         | Gene_count | P-value  |
|---------------------------------|------------|----------|
| muscle contraction              | 34         | 2.7E-14  |
| muscle system process           | 36         | 3.08E-13 |
| regulation of blood circulation | 26         | 1.86E-09 |
| blood circulation               | 33         | 9.42E-09 |
| regulation of heart contraction | 22         | 9.64E-09 |
| circulatory system process      | 33         | 1.13E-08 |
| regulation of system process    | 31         | 1.07E-07 |
| heart contraction               | 21         | 1.14E-07 |
| heart process                   | 21         | 1.38E-07 |
| actin filament-based process    | 36         | 2.35E-07 |

**D**

**PC-CIN up**

| GO_term                      | Gene_count | P-value  |
|------------------------------|------------|----------|
| mitotic cell cycle process   | 90         | 1.46E-48 |
| mitotic cell cycle           | 93         | 1.85E-48 |
| cell cycle process           | 106        | 1.53E-47 |
| nuclear division             | 73         | 6.39E-45 |
| cell cycle                   | 112        | 4.49E-44 |
| mitotic nuclear division     | 64         | 1.37E-44 |
| organelle fission            | 73         | 5.79E-43 |
| chromosome segregation       | 55         | 1.4E-39  |
| cell division                | 66         | 5.98E-38 |
| sister chromatid segregation | 45         | 5.06E-36 |

**PC-CIN down**

| GO_term                           | Gene_count | P-value  |
|-----------------------------------|------------|----------|
| vasculature development           | 37         | 1.21E-10 |
| cardiovascular system development | 46         | 5.55E-10 |
| circulatory system development    | 46         | 5.55E-10 |
| blood vessel development          | 34         | 1.61E-09 |
| blood vessel morphogenesis        | 31         | 2.13E-09 |
| muscle contraction                | 25         | 3.49E-09 |
| renal system development          | 22         | 2.32E-08 |
| muscle system process             | 26         | 4.13E-08 |
| urogenital system development     | 22         | 1.88E-07 |
| system process                    | 66         | 3.81E-07 |



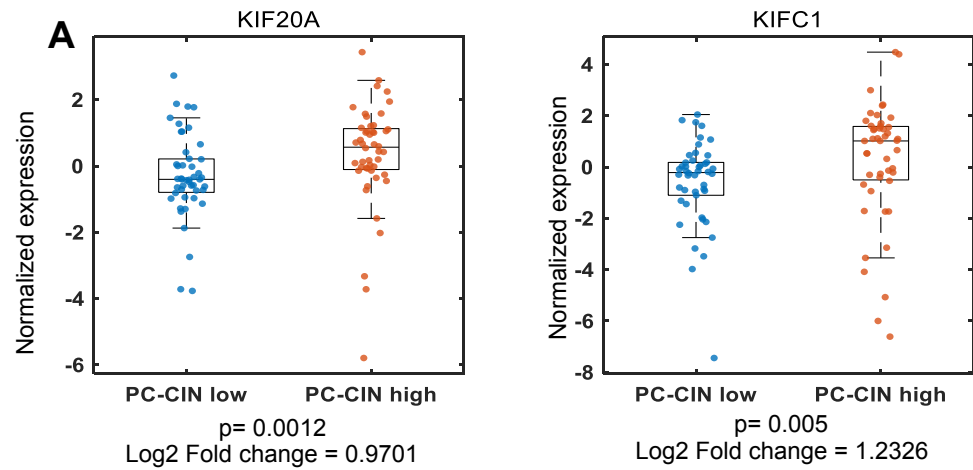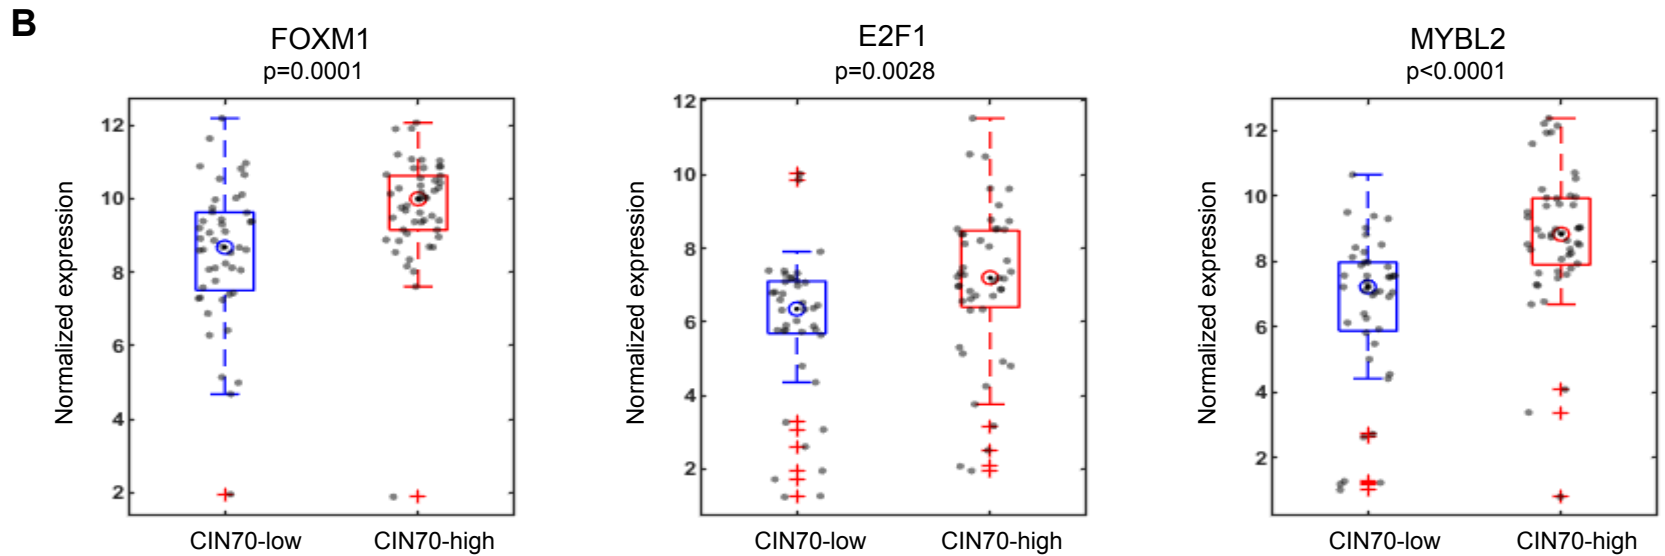

**Supplemental Figure 8. Differential gene expression of key CIN genes and transcriptional drivers. (A)** Box plots of kinetochore proteins KIF20A and KIF1C demonstrate significantly higher expression in PC-CIN-high PNBX cases. **(B)** Box plots of transcriptional drivers of chromosomal missegregation FOXM1, E2F1, MYBL2 demonstrate significant differences in expression in CIN70-high versus CIN70-low PNBX cases. Rank-sum  $p$  values are shown.

Supplemental Table 2: Clinical Characteristics of Expanded PNBX RNASeq Cohort (n = 121)

|                               | AA<br>(n=72) |     | White<br>(n=49) |     | p                   |
|-------------------------------|--------------|-----|-----------------|-----|---------------------|
|                               | n            | %   | n               | %   |                     |
| Age at Diagnosis, mean (SD)   | 66.9 (8.6)   |     | 68.6 (9.6)      |     | 0.3109              |
| PSA at Diagnosis              |              |     |                 |     |                     |
| ≤20                           | 38           | 54% | 26              | 53% | 0.9604              |
| >20                           | 33           | 46% | 23              | 47% |                     |
| Clinical T Stage              |              |     |                 |     |                     |
| T1/T2                         | 54           | 78% | 27              | 63% | 0.0751              |
| T3/T4                         | 15           | 22% | 16              | 37% |                     |
| Clinical N Stage              |              |     |                 |     |                     |
| N0                            | 52           | 72% | 36              | 73% | 0.4637              |
| N1                            | 13           | 18% | 11              | 22% |                     |
| NX                            | 7            | 10% | 2               | 4%  |                     |
| Primary Gleason               |              |     |                 |     |                     |
| 3                             | 4            | 6%  | 3               | 6%  | 0.9296 <sup>a</sup> |
| 4                             | 60           | 85% | 39              | 81% |                     |
| 5                             | 7            | 10% | 6               | 13% |                     |
| Biochemical Recurrence (n=63) |              |     |                 |     |                     |
| No                            | 25           | 63% | 14              | 61% | 0.8979              |
| Yes                           | 15           | 38% | 9               | 39% |                     |
| CRPC (n=65)                   |              |     |                 |     |                     |
| No                            | 10           | 29% | 7               | 23% | 0.6319              |
| Yes                           | 25           | 71% | 23              | 77% |                     |
| M stage                       |              |     |                 |     |                     |
| M0                            | 48           | 67% | 27              | 55% | 0.1983              |
| M1                            | 24           | 33% | 22              | 45% |                     |
| Death Status                  |              |     |                 |     |                     |
| Alive                         | 44           | 61% | 23              | 47% | 0.1804 <sup>a</sup> |
| Died from CaP                 | 25           | 35% | 25              | 51% |                     |
| Died from other causes        | 3            | 4%  | 1               | 2%  |                     |

a. Fisher's exact

Supplemental Table 3: Univariate analysis of PC outcomes in AA and EA men stratified by PC-CIN score

|                             | African-American (n=72) |     |                       |     | p             | White (n=49)         |     |                       |     | p                 |
|-----------------------------|-------------------------|-----|-----------------------|-----|---------------|----------------------|-----|-----------------------|-----|-------------------|
|                             | PC-CIN Low<br>(n=41)    |     | PC-CIN High<br>(n=31) |     |               | PC-CIN Low<br>(n=27) |     | PC-CIN High<br>(n=22) |     |                   |
|                             | n                       | %   | n                     | %   |               | n                    | %   | n                     | %   |                   |
| Age at Diagnosis, mean (SD) | 66.69 (8.4)             |     | 66.8 (8.9)            |     | 0.9434        | 68.9 (9.4)           |     | 68.2 (10.0)           |     | 0.8063            |
| <b>PSA at Diagnosis</b>     |                         |     |                       |     |               |                      |     |                       |     |                   |
| ≤20                         | 24                      | 60% | 14                    | 45% | 0.2137        | 18                   | 67% | 8                     | 36% | <b>0.0345</b>     |
| >20                         | 16                      | 40% | 17                    | 55% |               | 9                    | 33% | 14                    | 64% |                   |
| <b>Clinical T Stage</b>     |                         |     |                       |     |               |                      |     |                       |     |                   |
| T1/T2                       | 33                      | 79% | 21                    | 75% | 0.5873        | 15                   | 65% | 12                    | 60% | 0.7241            |
| T3/T4                       | 9                       | 21% | 7                     | 25% |               | 8                    | 35% | 8                     | 40% |                   |
| <b>Clinical M Stage</b>     |                         |     |                       |     |               |                      |     |                       |     |                   |
| M0                          | 33                      | 80% | 15                    | 48% | <b>0.0042</b> | 22                   | 81% | 5                     | 23% | <b>&lt;0.0001</b> |
| M1                          | 8                       | 20% | 16                    | 52% |               | 5                    | 19% | 17                    | 77% |                   |
| <b>CRPC</b>                 |                         |     |                       |     |               |                      |     |                       |     |                   |
| No                          | 8                       | 47% | 2                     | 11% | <b>0.0275</b> | 6                    | 55% | 1                     | 5%  | <b>0.0045</b>     |
| Yes                         | 9                       | 53% | 16                    | 89% |               | 5                    | 45% | 18                    | 95% |                   |
| <b>Vital Status</b>         |                         |     |                       |     |               |                      |     |                       |     |                   |
| Alive                       | 31                      | 76% | 13                    | 42% | <b>0.0036</b> | 19                   | 70% | 4                     | 18% | <b>0.0004</b>     |
| Died from CaP               | 8                       | 20% | 17                    | 55% |               | 8                    | 30% | 17                    | 77% |                   |
| Died from other causes      | 2                       | 5%  | 1                     | 3%  |               | 0                    | 0%  | 1                     | 5%  |                   |

Supplemental Table 4: De Novo Metastatic (M1) Cases

|                               | PC-CIN-High (n = 32) | PC-CIN Low (n = 12) | P-value |
|-------------------------------|----------------------|---------------------|---------|
| Age                           | 69.8                 | 71.6                | 0.5834  |
| Race (Black versus non-Black) | 50%                  | 58%                 | 0.6221  |
| PSA >20 at Diagnosis          | 81%                  | 82%                 | 0.8085  |
| T3/T4                         | 41%                  | 60%                 | 0.4597  |
| N1 stage                      | 41%                  | 17%                 | 0.1207  |
| Primary Gleason 5             | 19%                  | 18%                 | 0.8596  |
| CRPC Progression              | 84%                  | 58%                 | 0.1377  |
| PC-Death                      | 81%                  | 67%                 | 0.4218  |
| All-Cause Mortality           | 88%                  | 75%                 | 0.3694  |

Supplemental Table 5: All cases with Metastatic Progression (M1 + M0)

|                               | PC-CIN-High (n = 29) | PC-CIN Low (n = 27) | P-value       |
|-------------------------------|----------------------|---------------------|---------------|
| Age                           | 68.8                 | 68.8                | 0.9944        |
| Race (Black versus non-Black) | 51%                  | 63%                 | 0.3472        |
| PSA >20 at Diagnosis          | 77%                  | 65%                 | 0.6022        |
| T3/T4                         | 35%                  | 33%                 | 0.877         |
| N1 stage                      | 41%                  | 15%                 | <b>0.027</b>  |
| Primary Gleason 5             | 16%                  | 7.70%               | 0.465         |
| CRPC Progression              | 87%                  | 48%                 | <b>0.0009</b> |
| PC-Death                      | 85%                  | 59%                 | <b>0.0206</b> |
| All-Cause Mortality           | 90%                  | 63%                 | <b>0.0089</b> |
